# Supplementary material
Source: PubMed Central journal article supplement (PMC3647680)
Supplement: NIHMS403964-supplement-supplement_1.pdf [file NIHMS403964-supplement-supplement_1.pdf]

| Family ID            | Exon Number | Nucleotide Change | Amino Acid Change | Polyphen-2 Prediction | Polyphen-2 Score |
|----------------------|-------------|-------------------|-------------------|-----------------------|------------------|
| CHOP-AG <sup>6</sup> | 2           | c.175T>C          | p.W59R            | Probably damaging     | 1.000            |
| FG-CI <sup>5</sup>   | 8           | c.784T>C          | p.S262P           | Probably damaging     | 1.000            |
| FG-HW                | 4           | c.457T>C          | p.F153L           | Probably damaging     | 1.000            |
| FG-HX                | 2           | c.214G>C          | p.E72Q            | Possibly damaging     | 0.911            |
| FS-A <sup>5</sup>    | 8           | c.763A>G          | p.K255E           | Possibly damaging     | 0.719            |
| FS-X <sup>5</sup>    | 8           | c.776C>T          | p.T259I           | Probably damaging     | 1.000            |
| FS-XL <sup>6</sup>   | 4           | c.445-447delATC   | p.I149del         | N/A                   | N/A              |

Supplementary Table 1. List of *ACTN4* heterozygous missense mutations by family and *in silico* protein function prediction according to Polyphen-2 software. Alterations in nucleotide and amino acid sequence are reported using the following NCBI RefSeq accession numbers: ACTN4 – NM\_004924 and NP\_004915.

| Family ID          | Exon Number | Nucleotide Change | Amino Acid Change | Polyphen-2 Prediction | Polyphen-2 Score |
|--------------------|-------------|-------------------|-------------------|-----------------------|------------------|
| FG-BN <sup>7</sup> | 2           | c.808T>A          | p.S270T           | Probably damaging     | 0.999            |
| FG-FQ <sup>7</sup> | 13          | c.2683C>T         | p.R895C           | Probably damaging     | 1.000            |
| FG-MM              | 2           | c.328T>G          | p.N110H           | Probably damaging     | 1.000            |
| FS-XR <sup>7</sup> | 13          | c.2689G>A         | p.E897K           | Probably damaging     | 0.998            |
| FS-Z <sup>7</sup>  | 12          | c.2455A>T         | p.K874-           | N/A                   | N/A              |

Supplementary Table 2. List of *TRPC6* heterozygous missense mutations by family and *in silico* protein function prediction according to Polyphen-2 software. Alterations in nucleotide and amino acid sequence are reported using the following NCBI RefSeq accession numbers: TRPC6 – NM\_004621 and NP\_004612.
